# Supplementary material for: A C8P monolayer with cross-sp-hybridized phosphorus atoms and ultrahigh energy density as a K-ion battery anode
Source: Royal Society of Chemistry journal article supplement (doi:10.1039/d4ta04961f), 2024-01-01
Supplement: d4ta04961f1.pdf [file d4ta04961f1.pdf]

**A C<sub>8</sub>P monolayer with cross-sp-hybridized phosphorus atom and ultrahigh energy density  
as a K-ion battery anode**

Xu Yan<sup>1</sup>, Sheng Wang<sup>1</sup>, Shicong Ding<sup>1</sup>, Javed Rehman<sup>2,\*</sup>, Yong Liu, and Guochun Yang<sup>1,3\*</sup>

*<sup>1</sup>State Key Laboratory of Metastable Materials Science & Technology and Key Laboratory for Microstructural Material Physics of Hebei Province, School of Science, Yanshan University, Qinhuangdao 066004, China*

*<sup>2</sup>State Key Laboratory of Metastable Materials Science and Technology, School of Materials Science and Engineering, Yanshan University, Qinhuangdao 066004, China*

*<sup>3</sup>Centre for Advanced Optoelectronic Functional Materials Research and Key Laboratory for UV Light-Emitting Materials and Technology of Northeast Normal University, Changchun 130024, China*

| <b>Index</b>                                                                                                                                                                                                                                                                | <b>page</b> |
|-----------------------------------------------------------------------------------------------------------------------------------------------------------------------------------------------------------------------------------------------------------------------------|-------------|
| 1. Computational details .....                                                                                                                                                                                                                                              | 3           |
| 2. AIMD simulations of the C <sub>8</sub> P, $\alpha$ -C <sub>7</sub> PN, and $\beta$ -C <sub>7</sub> PN monolayers at 300 K.....                                                                                                                                           | 4           |
| 3. Band structures of the C <sub>8</sub> P, $\alpha$ -C <sub>7</sub> PN, and $\beta$ -C <sub>7</sub> PN monolayers at HSE06 level .....                                                                                                                                     | 4           |
| 4. Possible adsorption sites of Li/Na/K on $\alpha$ -C <sub>7</sub> PN and $\beta$ -C <sub>7</sub> PN monolayers .....                                                                                                                                                      | 4           |
| 5. Charge density difference, local maps of the scanning potential energy surface, and diffusion barrier energy of Li and Na migration on the C <sub>8</sub> P, $\alpha$ -C <sub>7</sub> PN, and $\beta$ -C <sub>7</sub> PN monolayers.....                                 | 5           |
| 6. Top/bottom K loading on the C <sub>8</sub> P, $\alpha$ -C <sub>7</sub> PN, and $\beta$ -C <sub>7</sub> PN monolayers .....                                                                                                                                               | 6           |
| 7. Relative stability of the C <sub>8</sub> PK <sub>x</sub> / $\alpha$ -C <sub>7</sub> PNK <sub>x</sub> / $\beta$ -C <sub>7</sub> PNK <sub>x</sub> with respect to solid K and the C <sub>8</sub> P/ $\alpha$ -C <sub>7</sub> PN/ $\beta$ -C <sub>7</sub> PN monolayer..... | 7           |
| 8. ELF snapshots of K loaded on the $\alpha$ -C <sub>7</sub> PN and $\beta$ -C <sub>7</sub> PN monolayer .....                                                                                                                                                              | 7           |
| 9. AIMD simulations of the C <sub>8</sub> P monolayer in an aqueous environment and C <sub>8</sub> PK <sub>8</sub> at 300 K.....                                                                                                                                            | 8           |
| 10. The constructed and optimized structures of the defective C <sub>8</sub> P monolayer .....                                                                                                                                                                              | 8           |
| 11. Performance of the defective C <sub>8</sub> P monolayer as K-ion battery anode.....                                                                                                                                                                                     | 9           |
| 12. Structural parameters of the C <sub>8</sub> P monolayer.....                                                                                                                                                                                                            | 10          |
| 13. Structural parameters of the $\alpha$ -C <sub>7</sub> PN monolayer .....                                                                                                                                                                                                | 11          |
| 14. Structural parameters of the $\beta$ -C <sub>7</sub> PN monolayer .....                                                                                                                                                                                                 | 12          |
| 15. Bond lengths in the C <sub>8</sub> P, $\alpha$ -C <sub>7</sub> PN, and $\beta$ -C <sub>7</sub> PN monolayers.....                                                                                                                                                       | 13          |
| 16. Elastic constants of the C <sub>8</sub> P, $\alpha$ -C <sub>7</sub> PN, and $\beta$ -C <sub>7</sub> PN monolayers.....                                                                                                                                                  | 13          |
| 17. Lattice parameters of the C <sub>8</sub> PK <sub>x</sub> , $\alpha$ -C <sub>7</sub> PNLi <sub>x</sub> , and $\beta$ -C <sub>7</sub> PNK <sub>x</sub> .....                                                                                                              | 13          |
| 18. References.....                                                                                                                                                                                                                                                         | 14          |

## Computational Details

The particle swarm optimization (PSO) method within the evolutionary algorithm as implemented in the Crystal structure Analysis by Particle Swarm Optimization (CALYPSO) code<sup>1,2</sup> was employed to find the lowest energy structures of  $C_xP_yN_z$  ( $x = 1\sim 16$ ,  $y = 1\sim 4$ , and  $z = 0\sim 2$ ) monolayers. Unit cells containing 1 and 2 formula units (f.u.) with buckled and planar structures were considered. In the first step, random structures with certain symmetry were constructed in which atomic coordinates were generated by the crystallographic symmetry operations. Local optimizations using the VASP code<sup>3</sup> were done with the conjugate gradients method and stopped when Gibbs free energy changes became smaller than  $1 \times 10^{-6}$  eV per cell. After processing the first-generation structures, 60% of them with lower enthalpies were selected to construct the next generation structures by Particle Swarm Optimization (PSO). 40% of the structures in the new generation were randomly generated. A structure fingerprinting technique of bond characterization matrix was applied to the generated structures, so that identical structures were strictly forbidden. These procedures significantly enhance the diversity of the structures, which is crucial for structural global search efficiency. In most cases, structural searching simulations for each calculation were stopped after generating 500 ~ 600 structures (e.g., about 10 ~ 15 generations).

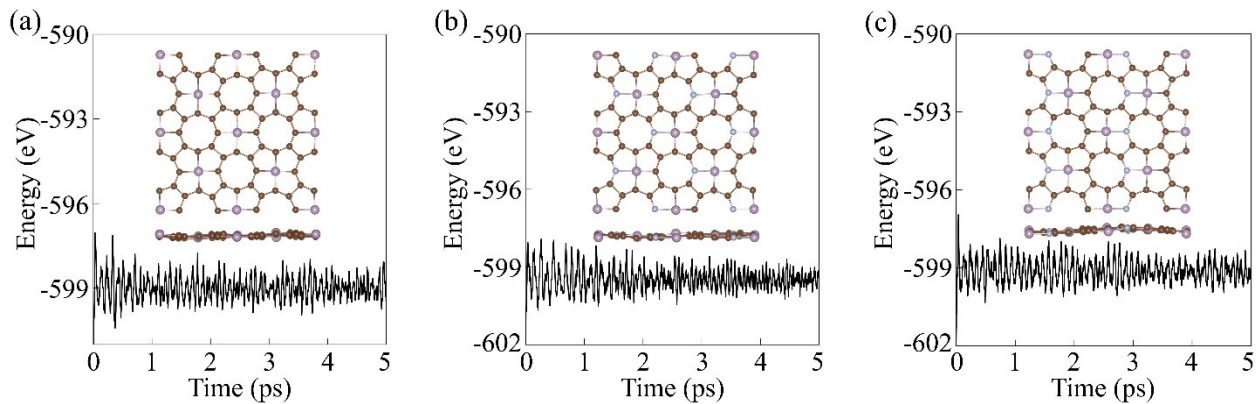

**Fig. S1** AIMD simulations of the (a)  $C_8P$ , (b)  $\alpha$ - $C_7PN$ , and (c)  $\beta$ - $C_7PN$  monolayers at 300 K.

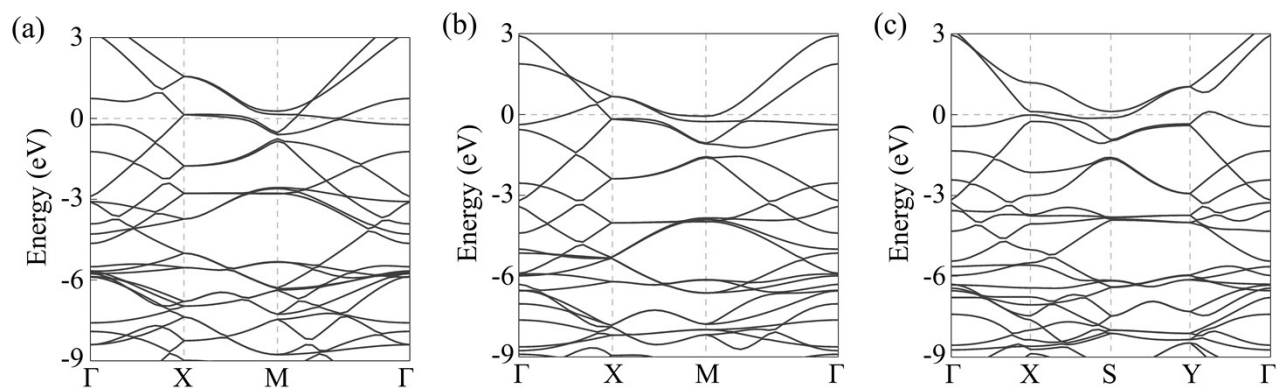

**Fig. S2** Band structures of the (a)  $C_8P$ , (b)  $\alpha$ - $C_7PN$ , and (c)  $\beta$ - $C_7PN$  monolayers at HSE06 level.

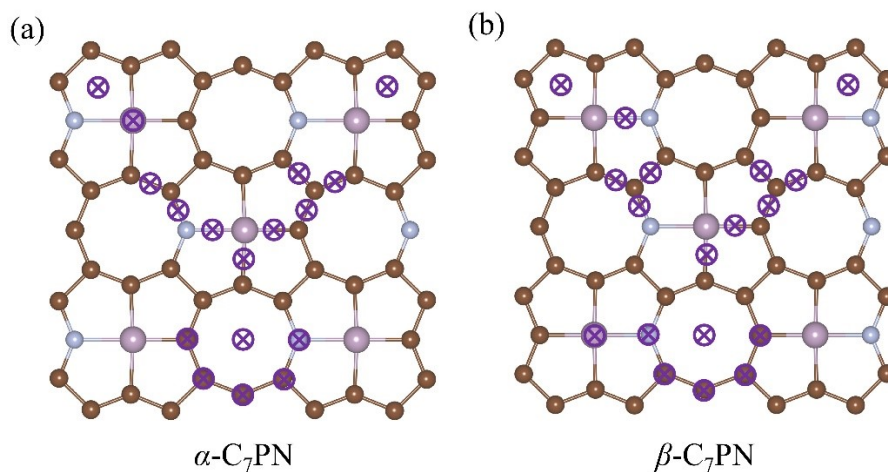

**Fig. S3** Possible adsorption sites of Li/Na/K on the (a)  $\alpha$ - $C_7PN$  and (b)  $\beta$ - $C_7PN$  monolayers.

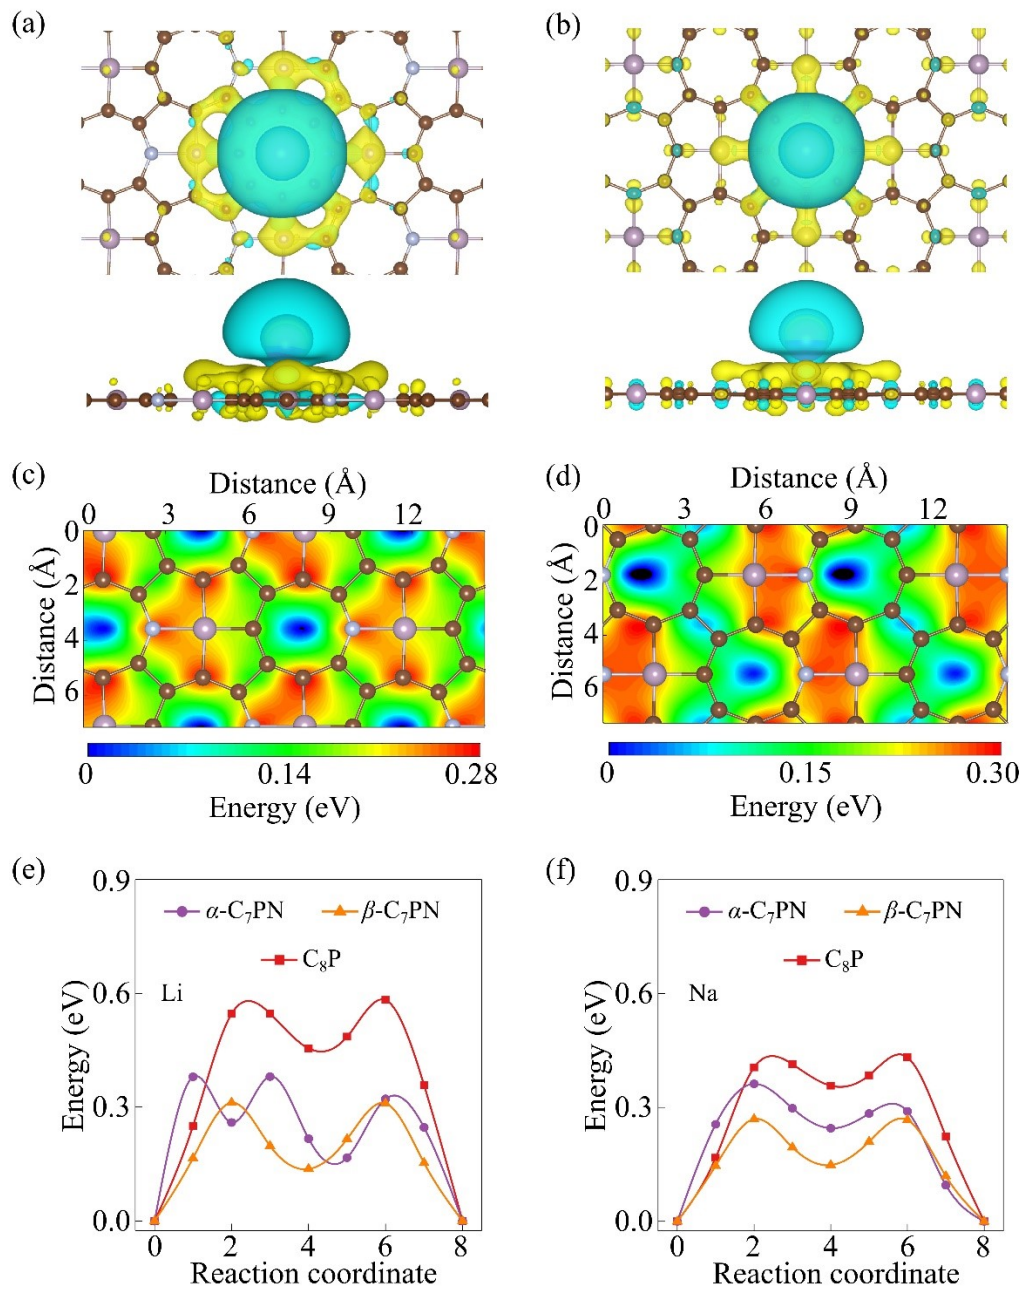

**Fig. S4** Charge density difference of K adsorbed on the (a)  $\alpha$ -C<sub>7</sub>PN and (b)  $\beta$ -C<sub>7</sub>PN monolayers. Local maps of the scanning potential energy surface of the (c)  $\alpha$ -C<sub>7</sub>PN and (d)  $\beta$ -C<sub>7</sub>PN monolayers. Diffusion barrier energy of (e) Li and (f) Na migration on the C<sub>8</sub>P,  $\alpha$ -C<sub>7</sub>PN, and  $\beta$ -C<sub>7</sub>PN monolayers.

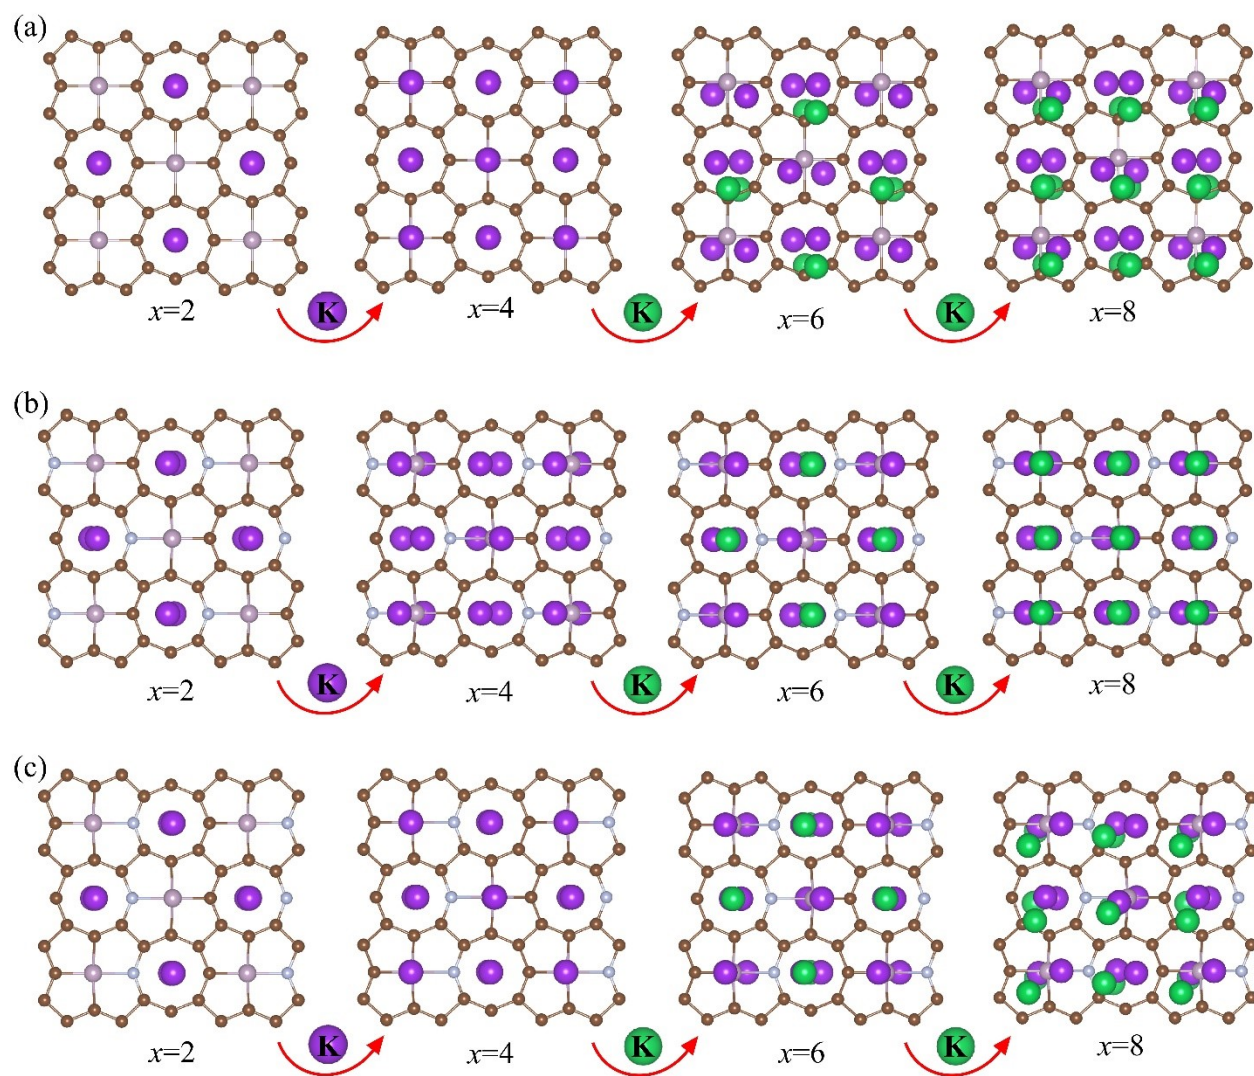

**Fig. S5** Top/bottom K loading on the (a)  $C_8P$ , (b)  $\alpha$ - $C_7PN$ , and (c)  $\beta$ - $C_7PN$  monolayers.

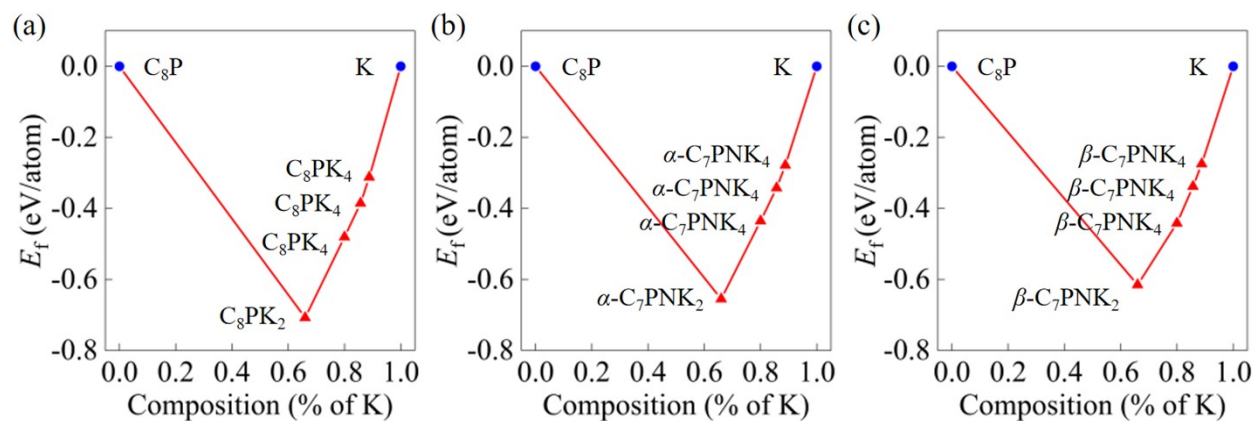

**Fig. S6** Relative stability of (a) C<sub>8</sub>PK<sub>x</sub>, (b)  $\alpha$ -C<sub>7</sub>PNK<sub>x</sub>, and (c)  $\beta$ -C<sub>7</sub>PNK<sub>x</sub> ( $x = 2, 4, 6, 8$ ) with respect to an elemental solid K and the C<sub>8</sub>P/ $\alpha$ -C<sub>7</sub>PN/ $\beta$ -C<sub>7</sub>PN monolayer at 0 K. The optimized monolayers corresponding to the data points located on the convex hull are thermodynamically stable.

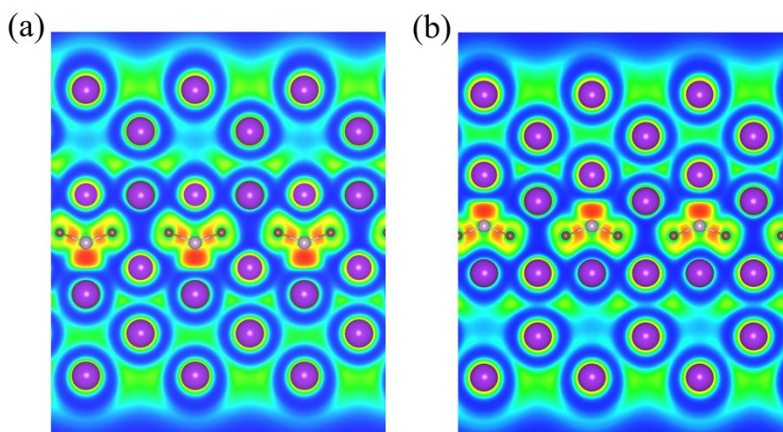

**Fig. S7** ELF snapshots of K loaded on the (a)  $\alpha$ -C<sub>7</sub>PN and (c)  $\beta$ -C<sub>7</sub>PN monolayers.

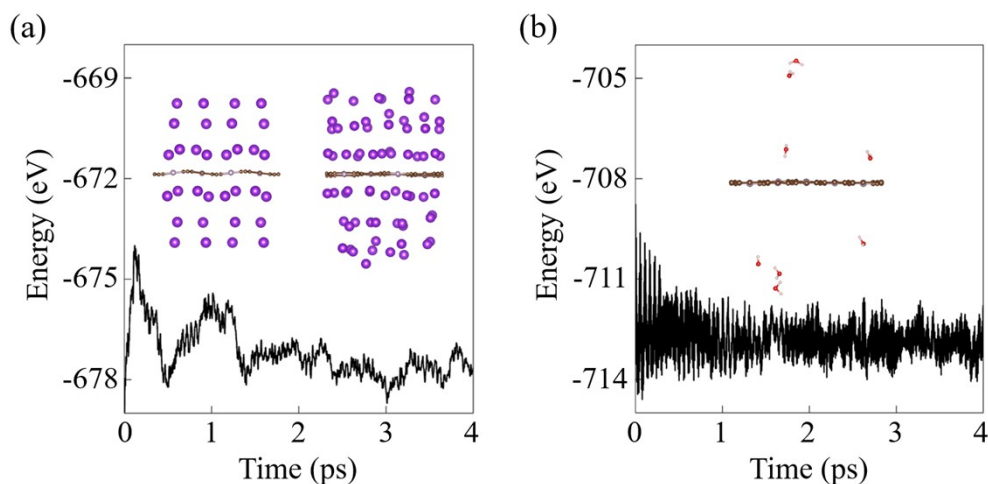

**Fig. S8** (a) AIMD simulations of  $C_8PK_8$  at 300 K. (b) AIMD simulations of the  $C_8P$  monolayer in an aqueous environment at 300 K.

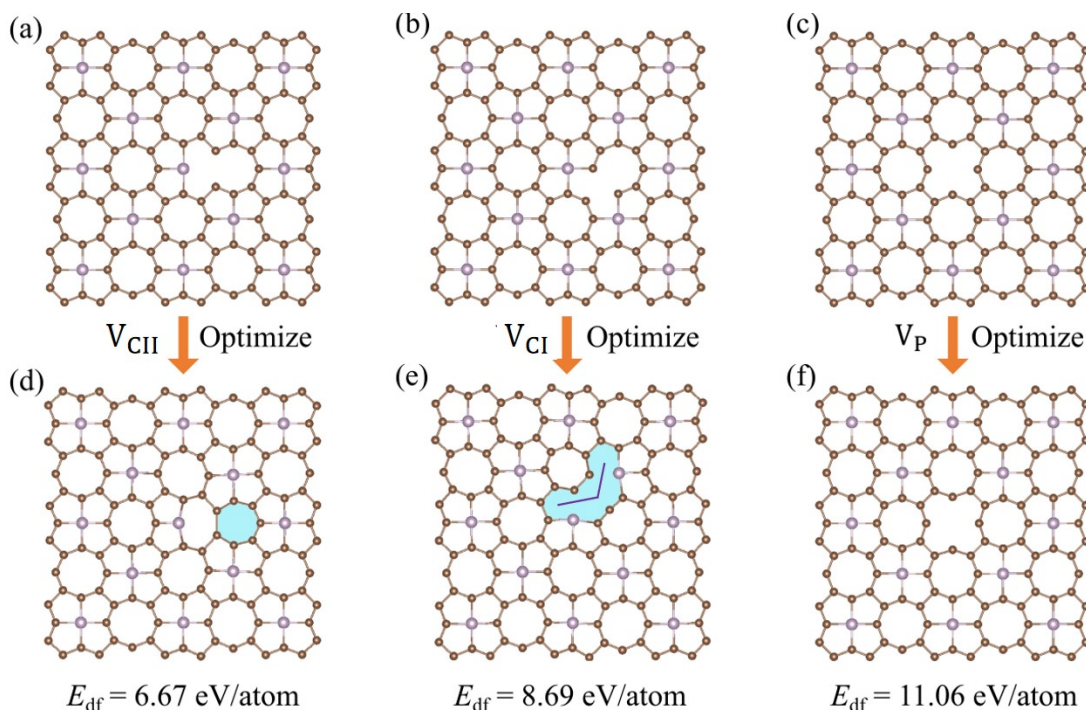

**Fig. S9** (a-c) The constructed and (d-f) the optimized structures of  $C_8P$  containing a single C vacancy ( $V_{CII}$  and  $V_{CI}$ ) and P vacancy ( $V_P$ ).



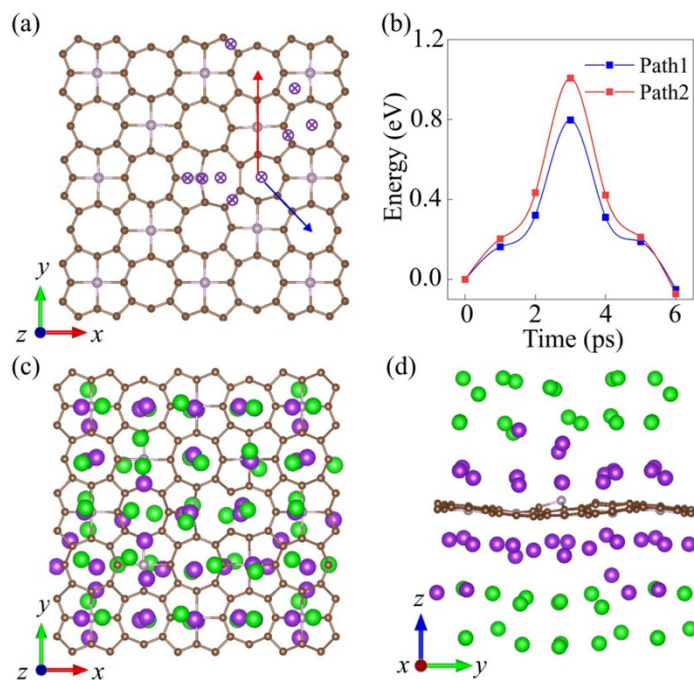

**Fig. S10** (a) Considered K absorption site and migration paths of the C<sub>8</sub>P monolayer with  $V_{CI}$ . (b) Diffusion energy barriers of K migration on the defective C<sub>8</sub>P monolayer. (c and d) Top and side views of the C<sub>8</sub>PK<sub>8</sub> with  $V_{CI}$ .

**Table S1** Structural parameters of the C<sub>8</sub>P monolayer obtained from PBE functional, lattice parameters in bracket are obtained with the PBEsol functional.

|                       | Lattice                     |        | Positions    |          |          |
|-----------------------|-----------------------------|--------|--------------|----------|----------|
|                       | Parameters                  | Atoms  | (fractional) |          |          |
|                       | (Å, °)                      |        | <i>x</i>     | <i>y</i> | <i>z</i> |
| <b>C<sub>8</sub>P</b> | $a = 7.313(7.298)$          | C      | 0.3301       | 0.0000   | 0.5000   |
|                       | $b = 7.313(7.298)$          | C      | 0.7589       | 0.8216   | 0.5000   |
|                       | $c = 20.9283$               | C      | 0.7589       | 0.1784   | 0.5000   |
|                       | $\alpha = \beta = \gamma =$ | C      | 0.9021       | 0.3216   | 0.5000   |
|                       | 90.0000                     | C      | 0.9021       | 0.6784   | 0.5000   |
|                       |                             | C      | 0.0805       | 0.7504   | 0.5000   |
|                       |                             | C      | 0.0805       | 0.2496   | 0.5000   |
|                       |                             | C      | 0.8301       | 0.5000   | 0.5000   |
|                       |                             | C      | 0.2589       | 0.3216   | 0.5000   |
|                       |                             | C      | 0.2589       | 0.6784   | 0.5000   |
|                       |                             | C      | 0.4021       | 0.8216   | 0.5000   |
|                       |                             | C      | 0.4021       | 0.1783   | 0.5000   |
|                       |                             | C      | 0.5802       | 0.2504   | 0.5000   |
|                       |                             | C      | 0.5802       | 0.7496   | 0.5000   |
|                       |                             | C      | 0.8309       | 0.0000   | 0.5000   |
|                       |                             | C      | 0.3309       | 0.5000   | 0.5000   |
|                       | P                           | 0.0805 | 0.0000       | 0.5000   |          |
|                       | P                           | 0.5805 | 0.5000       | 0.5000   |          |

**Table S2** Structural parameters of the  $\alpha$ -C<sub>7</sub>PN monolayer obtained from PBE functional, lattice parameters in bracket are obtained with the PBEsol functional.

|                             | Lattice                     |        | Positions    |          |          |
|-----------------------------|-----------------------------|--------|--------------|----------|----------|
|                             | Parameters                  | Atoms  | (fractional) |          |          |
|                             | (Å, °)                      |        | <i>x</i>     | <i>y</i> | <i>z</i> |
| $\alpha$ -C <sub>7</sub> PN | $a = 7.330(7.311)$          | C      | 0.3300       | 0.0000   | 0.5000   |
|                             | $b = 7.174(7.161)$          | C      | 0.7585       | 0.8240   | 0.5000   |
|                             | $c = 20.9283$               | C      | 0.7585       | 0.1760   | 0.5000   |
|                             | $\alpha = \beta = \gamma =$ | C      | 0.9013       | 0.3193   | 0.5000   |
|                             | 90.0000                     | C      | 0.9013       | 0.6807   | 0.5000   |
|                             |                             | C      | 0.0794       | 0.7504   | 0.5000   |
|                             |                             | C      | 0.0794       | 0.2496   | 0.5000   |
|                             |                             | C      | 0.8298       | 0.5000   | 0.5000   |
|                             |                             | C      | 0.2585       | 0.3240   | 0.5000   |
|                             |                             | C      | 0.2585       | 0.6760   | 0.5000   |
|                             |                             | C      | 0.4013       | 0.8193   | 0.5000   |
|                             |                             | C      | 0.4013       | 0.1807   | 0.5000   |
|                             |                             | C      | 0.5793       | 0.2504   | 0.5000   |
|                             |                             | C      | 0.5793       | 0.7496   | 0.5000   |
|                             | P                           | 0.8880 | 0.0000       | 0.5000   |          |
|                             | P                           | 0.5888 | 0.5000       | 0.5000   |          |
|                             | N                           | 0.8277 | 0.0000       | 0.5000   |          |
|                             | N                           | 0.3277 | 0.5000       | 0.5000   |          |

**Table S3** Structural parameters of the  $\beta$ -C<sub>7</sub>PN monolayer obtained from PBE functional, lattice parameters in bracket are obtained with the PBEsol functional.

|                            | Lattice                     |         | Positions    |          |          |
|----------------------------|-----------------------------|---------|--------------|----------|----------|
|                            | Parameters                  | Atoms   | (fractional) |          |          |
|                            | (Å, °)                      |         | <i>x</i>     | <i>y</i> | <i>z</i> |
| $\beta$ -C <sub>7</sub> PN | $a = 7.312(7.294)$          | C       | 0.9294       | 0.5728   | 0.5000   |
|                            | $b = 7.178(7.164)$          | C       | 0.0706       | 0.0728   | 0.5000   |
|                            | $c = 20.9283$               | C       | 0.5715       | 0.5707   | 0.5000   |
|                            | $\alpha = \beta = \gamma =$ | C       | 0.4285       | 0.0707   | 0.5000   |
|                            | 90.0000                     | C       | 0.7529       | 0.5003   | 0.5000   |
|                            |                             | C       | 0.2471       | 0.0000   | 0.5000   |
|                            |                             | C       | 0.9294       | 0.9272   | 0.5000   |
|                            |                             | C       | 0.0706       | 0.4272   | 0.5000   |
|                            |                             | C       | 0.5715       | 0.9293   | 0.5000   |
|                            |                             | C       | 0.4285       | 0.4293   | 0.5000   |
|                            |                             | C       | 0.4995       | 0.7500   | 0.5000   |
|                            |                             | C       | 0.5005       | 0.2500   | 0.5000   |
|                            |                             | C       | 0.7529       | 0.0000   | 0.5000   |
|                            |                             | C       | 0.2472       | 0.5000   | 0.5000   |
|                            | P                           | 0.7468  | 0.2500       | 0.5000   |          |
|                            | P                           | 0.2532  | 0.7500       | 0.5000   |          |
|                            | N                           | 0.0019  | 0.7500       | 0.5000   |          |
|                            | N                           | -0.0019 | 0.2500       | 0.5000   |          |

**Table S4** Bond lengths in the C<sub>8</sub>P,  $\alpha$ -C<sub>7</sub>PN, and  $\beta$ -C<sub>7</sub>PN monolayers.

| Bond length (Å) | C <sub>8</sub> P | $\alpha$ -C <sub>7</sub> PN | $\beta$ -C <sub>7</sub> PN |
|-----------------|------------------|-----------------------------|----------------------------|
| C-C             | 1.41~1.48        | 1.40~1.47                   | 1.39~1.47                  |
| C-P             | 1.83             | 1.77~1.79                   | 1.80                       |
| C-N             |                  | 1.36                        | 1.38                       |
| P-N             |                  | 1.91                        | 1.83                       |

**Table S5** Elastic constants of the C<sub>8</sub>P,  $\alpha$ -C<sub>7</sub>PN, and  $\beta$ -C<sub>7</sub>PN monolayers.

| Parameters (N/m) | C <sub>8</sub> P | $\alpha$ -C <sub>7</sub> PN | $\beta$ -C <sub>7</sub> PN |
|------------------|------------------|-----------------------------|----------------------------|
| $C_{11}$         | 303.233          | 295.228                     | 300.164                    |
| $C_{12}$         | 58.461           | 77.596                      | 74.079                     |
| $C_{66}$         | 129.025          | 132.263                     | 132.487                    |

**Table S6** Lattice parameters (Å) of the C<sub>8</sub>PK<sub>x</sub>,  $\alpha$ -C<sub>7</sub>PNK<sub>x</sub>, and  $\beta$ -C<sub>7</sub>PNK<sub>x</sub> ( $x = 2, 4, 6, \text{ and } 8$ ).

| Phase                                     | $x = 2$    | $x = 4$    | $x = 6$    | $x = 8$    |
|-------------------------------------------|------------|------------|------------|------------|
| C <sub>8</sub> PK <sub>x</sub>            | $a = 7.35$ | $a = 7.39$ | $a = 7.39$ | $a = 7.39$ |
|                                           | $b = 7.39$ | $b = 7.40$ | $b = 7.39$ | $b = 7.38$ |
| $\alpha$ -C <sub>7</sub> PNK <sub>x</sub> | $a = 7.45$ | $a = 7.45$ | $a = 7.44$ | $a = 7.44$ |
|                                           | $b = 7.14$ | $b = 7.14$ | $b = 7.15$ | $b = 7.14$ |
| $\beta$ -C <sub>7</sub> PNK <sub>x</sub>  | $a = 7.37$ | $a = 7.43$ | $a = 7.43$ | $a = 7.43$ |
|                                           | $b = 7.22$ | $b = 7.17$ | $b = 7.16$ | $b = 7.15$ |

## References

1. Y. Wang, J. Lv, L. Zhu and Y. Ma, *Comput. Phys. Commun.*, 2012, **183**, 2063-2070.
2. Y. Wang, J. Lv, L. Zhu and Y. Ma, *Phys. Rev. B*, 2010, **82**, 094116.
3. G. Kresse and J. Furthmüller, *Phys. Rev. B*, 1996, **54**, 11169.
